# Supplementary material for: The variations of VOCs based on the policy change of Omicron in polluted winter in traffic-hub city, China
Source: Copernicus journal article supplement (doi:10.5194/egusphere-2024-575), 2024-03-08
Supplement: Supplementary file 1 [file egusphere-2024-575-supplement.pdf]

1 **The variations of VOCs based on the policy change of**  
2 **Omicron in polluted winter in traffic-hub city, China**

3 Bowen Zhang<sup>1,3</sup>, Dong Zhang<sup>2,3</sup>, Zhe Dong<sup>2,3</sup>, Xinshuai Song<sup>1,3</sup>, Ruiqin Zhang<sup>1,3</sup>,  
4 Xiao Li<sup>1,3,\*</sup>

5 <sup>1</sup>School of Ecology and Environment, Zhengzhou University, Zhengzhou 450001,  
6 China

7 <sup>2</sup>College of Chemistry, Zhengzhou University, Zhengzhou 450001, China

8 <sup>3</sup>Institute of Environmental Sciences, Zhengzhou University, Zhengzhou 450001,  
9 China

10

11 **Fig. S1. Trend of Omicron infection in China from 9 Dec. 2022 to 1 Jan. 2023**

12 **Fig. S2.  $Q_{\text{true}}/Q_{\text{exp}}$ ,  $Q_{\text{Robust}}/Q_{\text{exp}}$  for different quantitative factors**

13

14 **Table S1 Top 10 VOC species of SOAFP in Case 1**

15 **Table S2 Top 10 VOC species of SOAFP in Case 3**

16

17

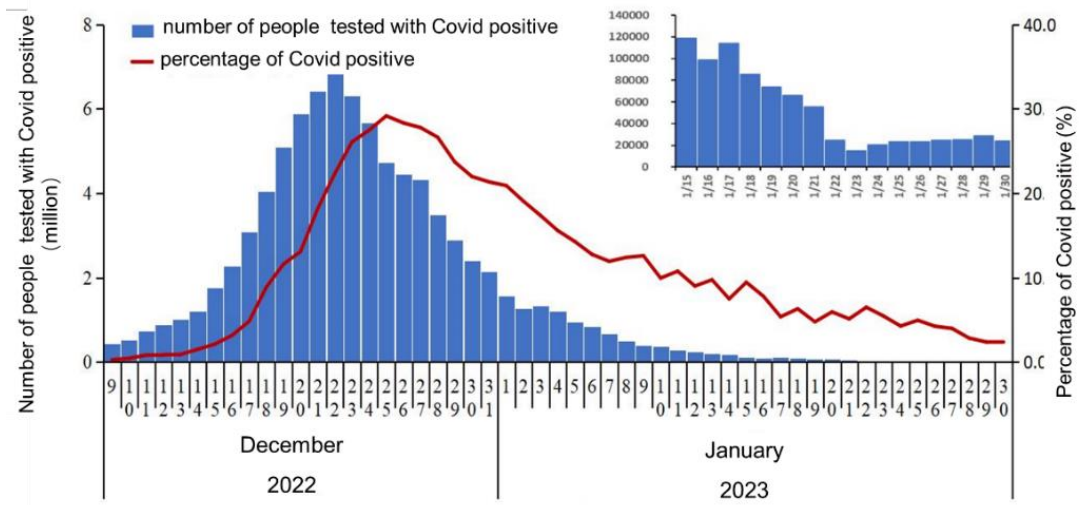

18

19

20

**Fig. S1 Trend of Omicron infection in China from 9 Dec. 2022 to 1 Jan. 2023 (CCDCP, 2023)**

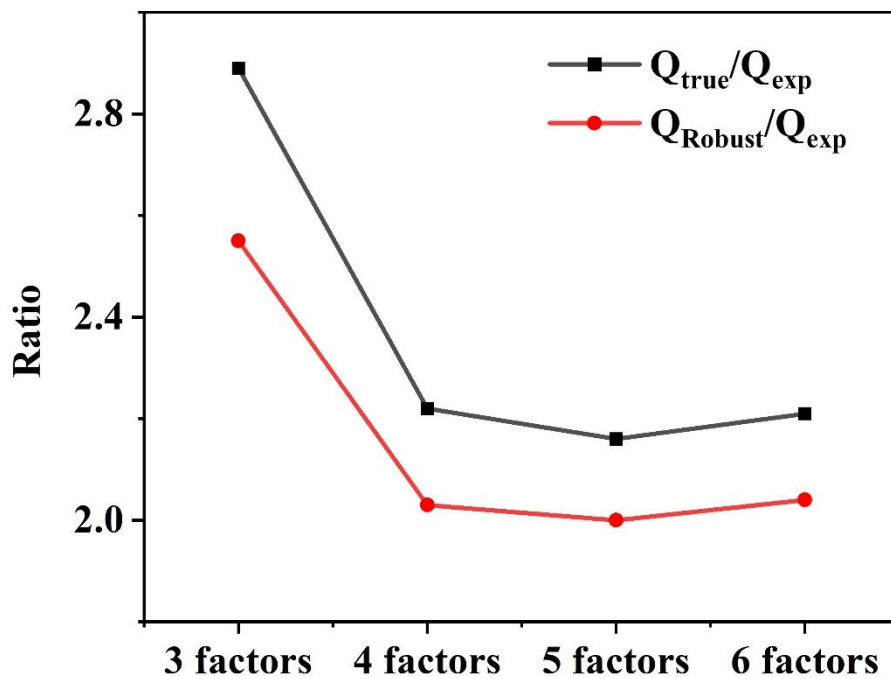

21

22

23

24

25

**Fig. S2.  $Q_{true}/Q_{exp}$ ,  $Q_{Robust}/Q_{exp}$  for different quantitative factors**

26  
27  
28  
29

**Table S1 Top 10 VOC species of SOAFP in Case 1**

| Material                    | SOAFP/ $\mu\text{g}/\text{m}^3$ | percentage of measured VOCs /% |
|-----------------------------|---------------------------------|--------------------------------|
| toluene                     | 34.6                            | 51.7                           |
| m/p-Xylene                  | 9.8                             | 14.6                           |
| benzene                     | 8.5                             | 12.7                           |
| o-xylene                    | 4.3                             | 6.4                            |
| ethylbenzene                | 4.3                             | 6.4                            |
| m-Ethyltoluene              | 1.4                             | 2.1                            |
| 1,2,4-Trimethylbenzene      | 1.1                             | 1.6                            |
| 1,3,5-Trimethylbenzene      | 0.7                             | 1.0                            |
| o-Ethyltoluene              | 0.5                             | 0.7                            |
| 1,2,3-Trimethylbenzene      | 0.5                             | 0.7                            |
| The total of top 10 species | 65.7                            | 97.9                           |

30  
31

**Table S2 Top 10 VOC specie of SOAFP in Case 3**

| Material                    | SOAFP/ $\mu\text{g}/\text{m}^3$ | percentage of measured VOCs /% |
|-----------------------------|---------------------------------|--------------------------------|
| toluene                     | 49.4                            | 45.2                           |
| m/p-Xylene                  | 19.4                            | 17.8                           |
| benzene                     | 13.4                            | 12.3                           |
| ethylbenzene                | 7.5                             | 6.9                            |
| o-xylene                    | 7.5                             | 6.9                            |
| 1,3,5-Trimethylbenzene      | 2.2                             | 2.0                            |
| m-Ethyltoluene              | 1.9                             | 1.7                            |
| 1,2,4-Trimethylbenzene      | 1.5                             | 1.4                            |
| o-Ethyltoluene              | 1.2                             | 1.1                            |
| 1,2,3-Trimethylbenzene      | 1.1                             | 1.0                            |
| The total of top 10 species | 105.1                           | 96.3                           |

32  
33  
34  
35  
36  
37  
38

## Reference

CCDCP, Chinese Center for Disease Control and Prevention  
[https://www.chinacdc.cn/jkzt/crb/zl/szkb\\_11803/jszl\\_13141/202302/t20230201\\_263576.html](https://www.chinacdc.cn/jkzt/crb/zl/szkb_11803/jszl_13141/202302/t20230201_263576.html) (Accessed at 18 Nov. 2023)
